# Supplementary material for: A Rad51-independent pathway promotes single-strand template repair in gene editing
Source: PubMed Central journal article supplement (PMC7591047; doi:10.1371/journal.pgen.1008689), 2020-10-15

# S1 Fig

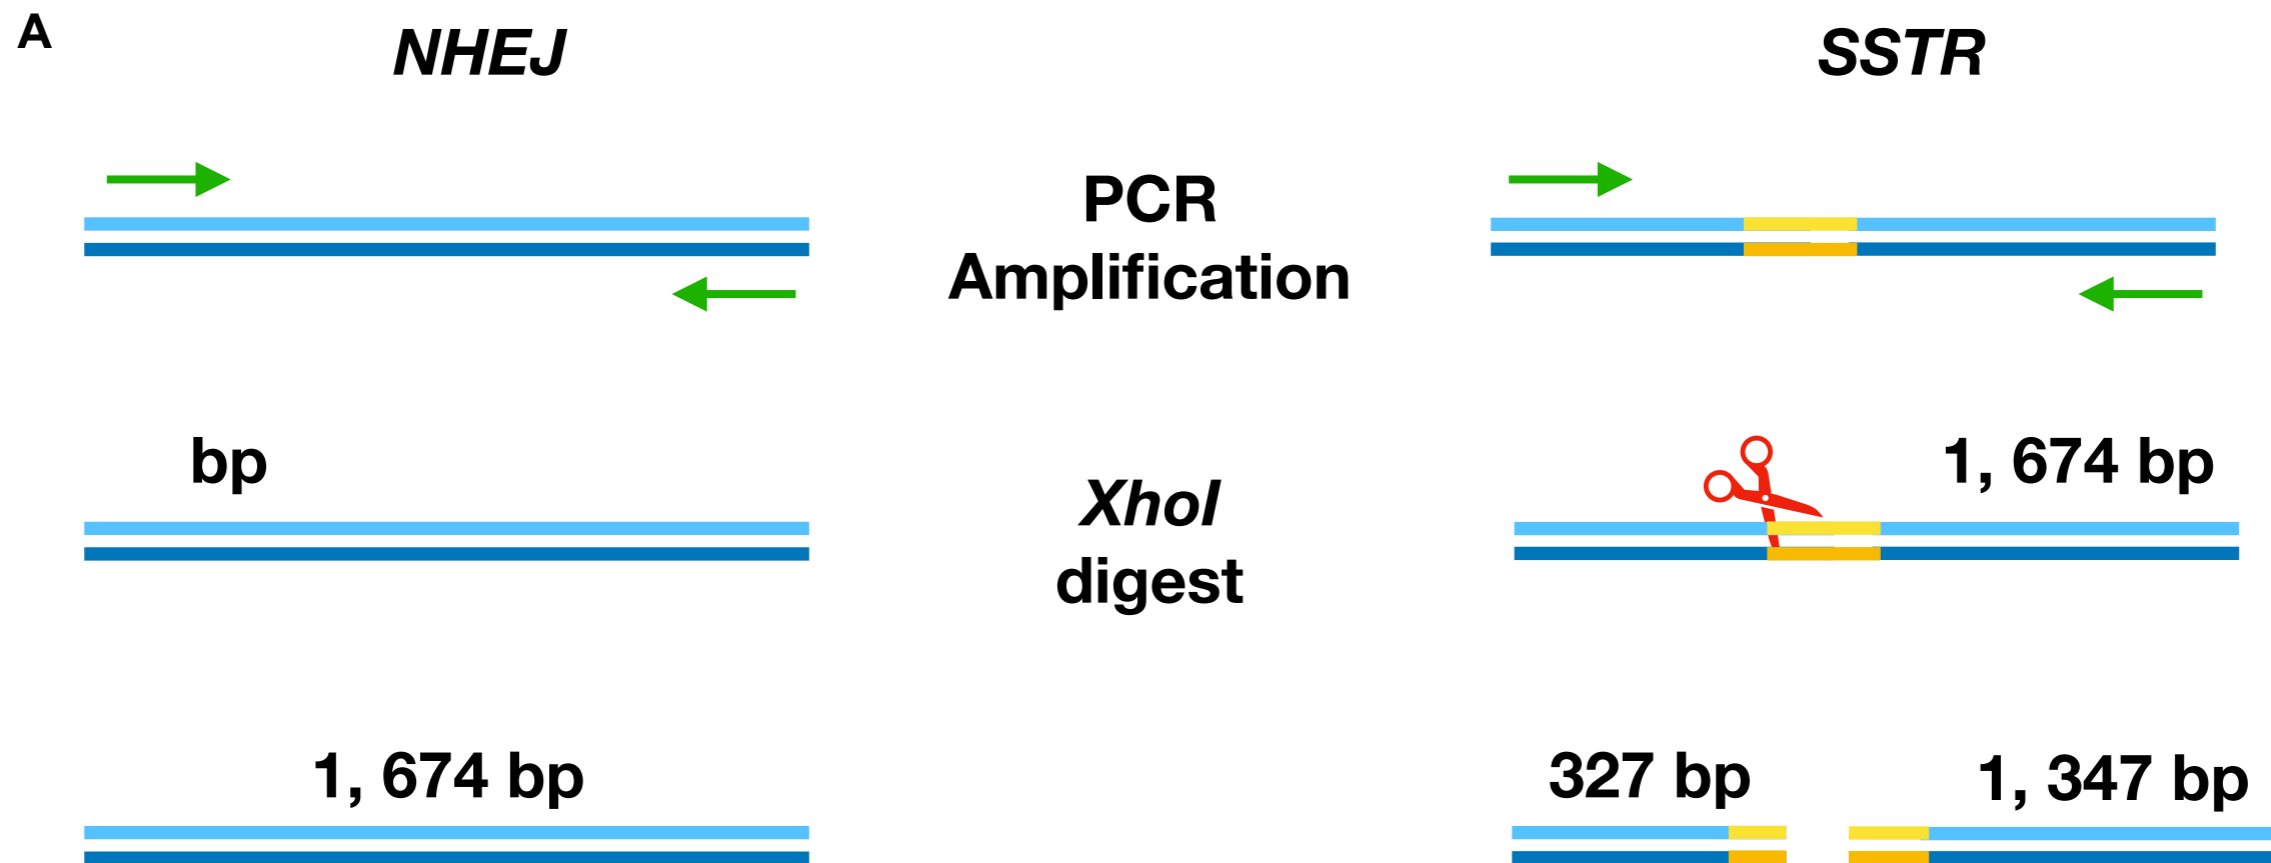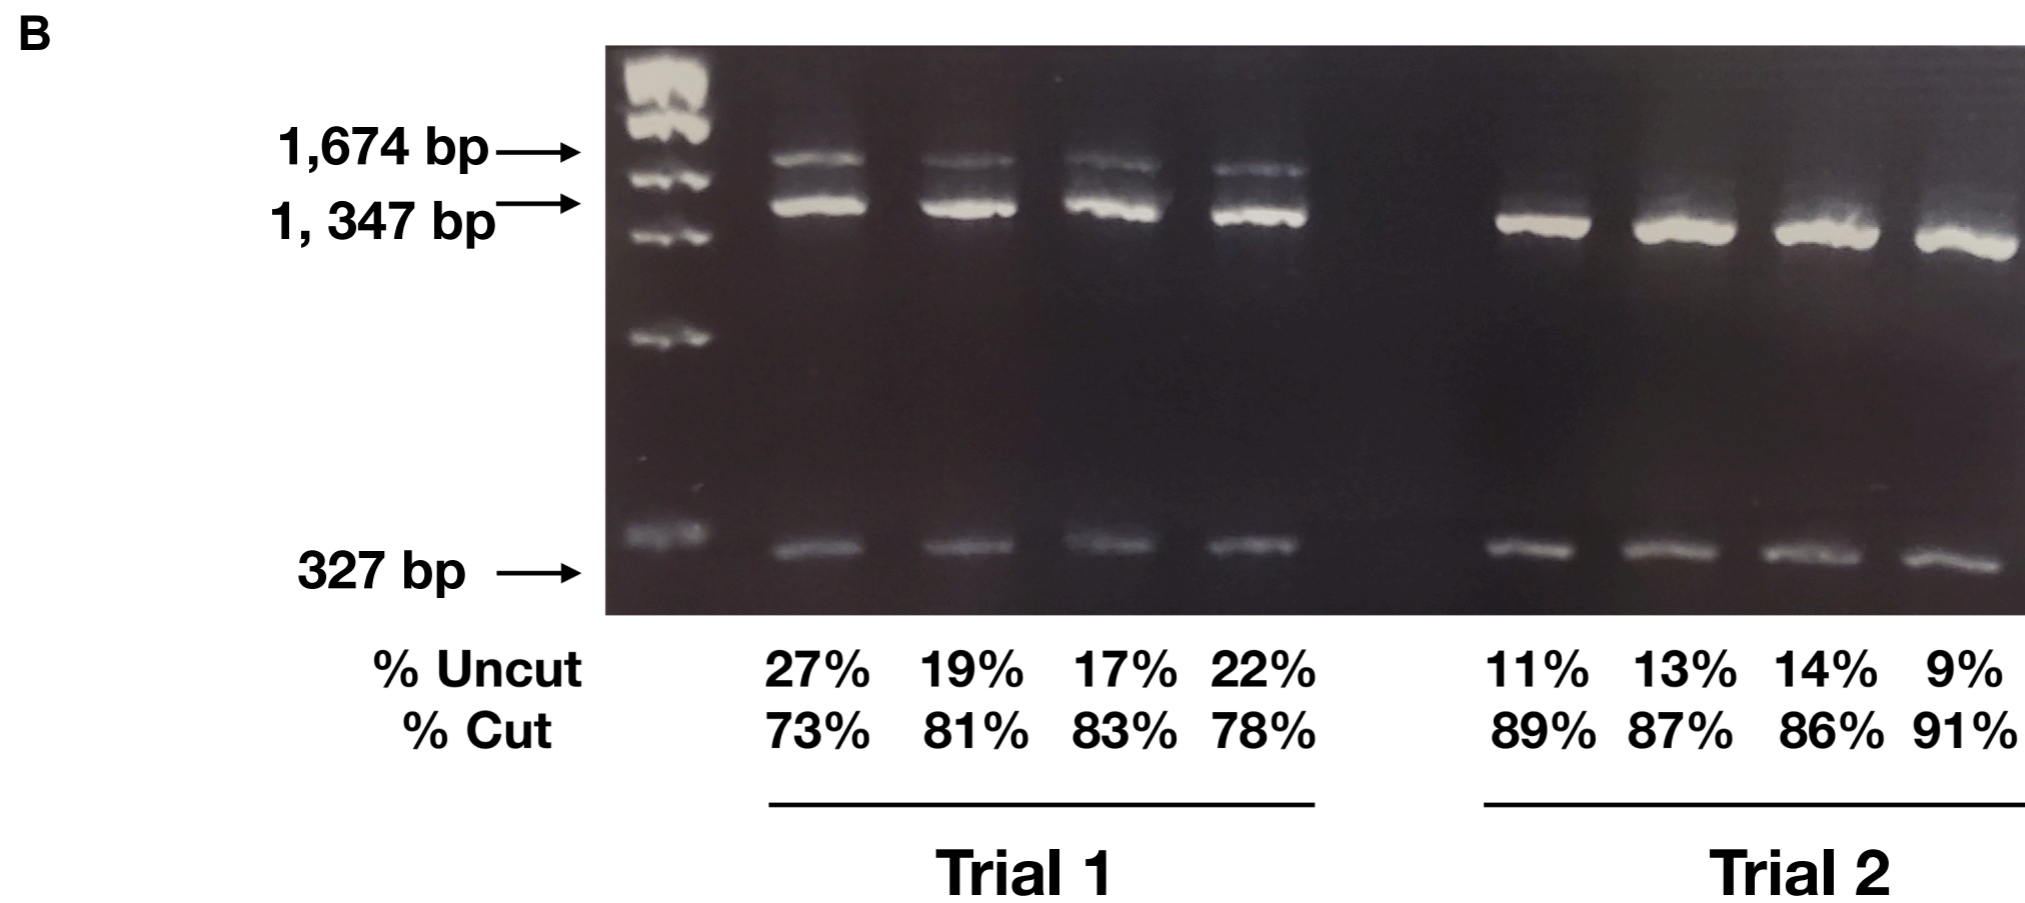

Supplement: pgen.1008689.s001.pdf [file pgen.1008689.s001.pdf]
