# Supplementary material for: A Rad51-independent pathway promotes single-strand template repair in gene editing
Source: PubMed Central journal article supplement (PMC7591047; doi:10.1371/journal.pgen.1008689), 2020-10-15
Supplement: pgen.1008689.s005.pdf [file pgen.1008689.s005.pdf]

**S5 Fig**

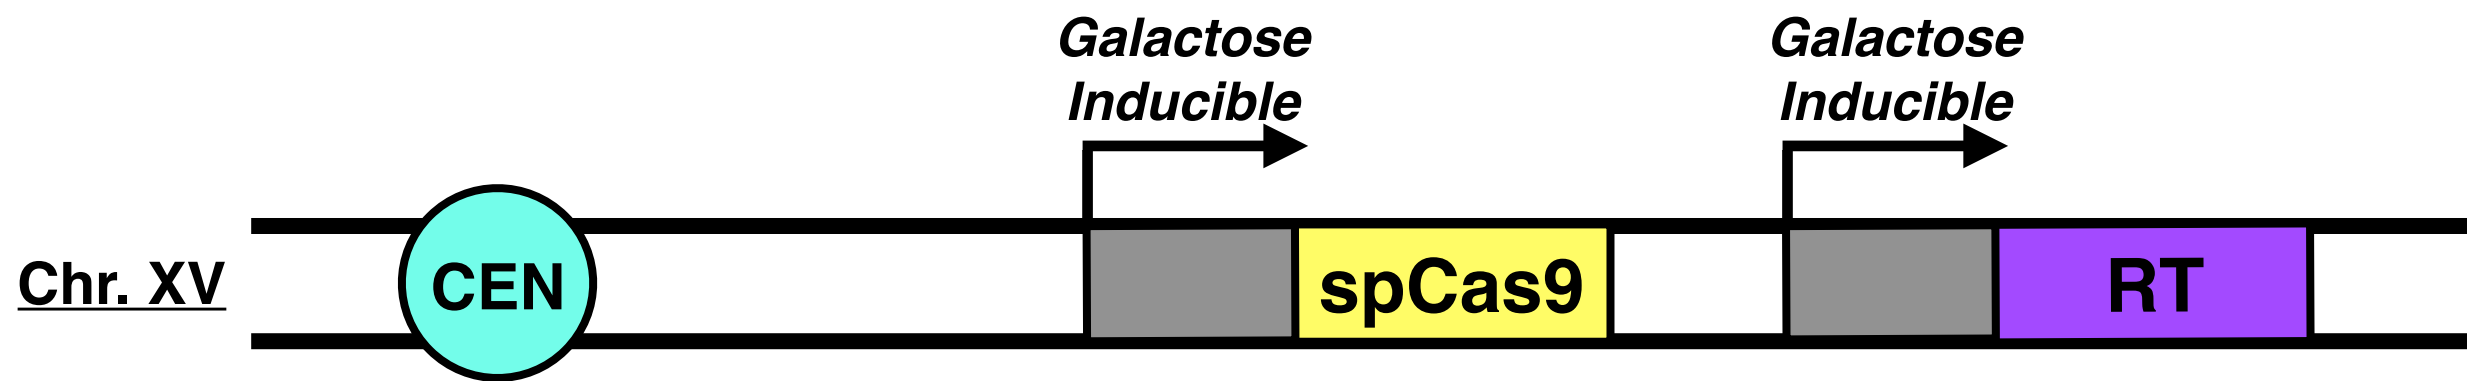

**A**

+

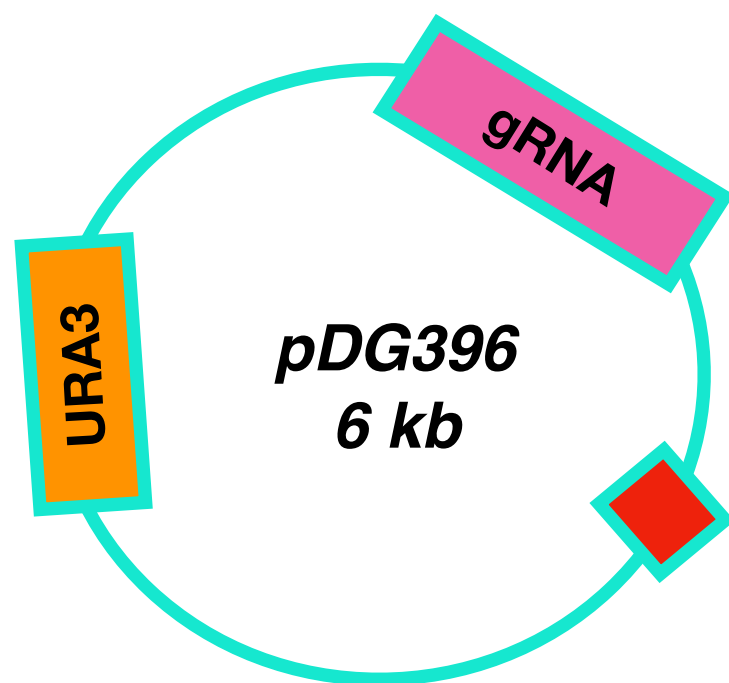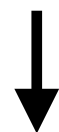

**Cas9 cleavage results in  
an unreparable DSB**

**B**

+

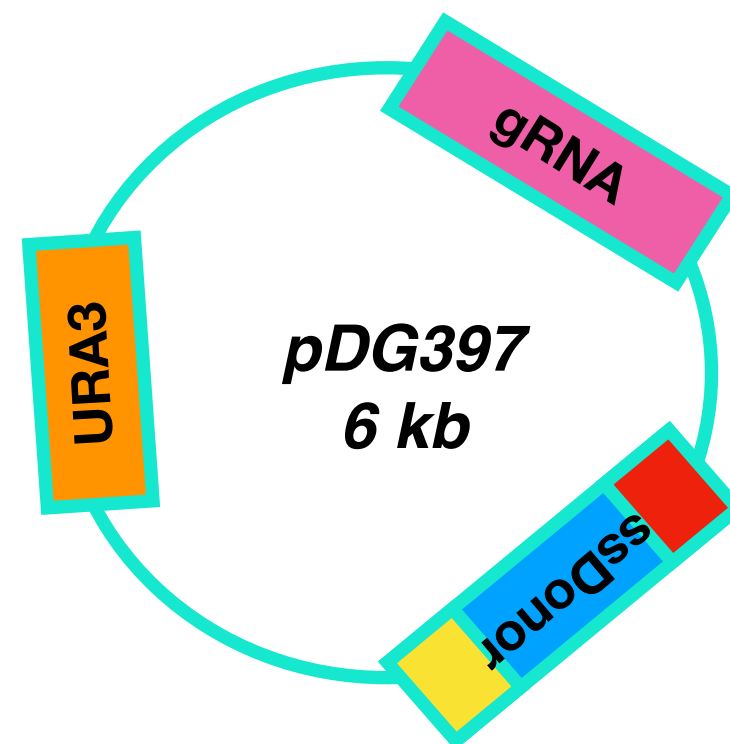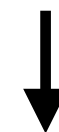

**ssDonor provides a  
template Cas9 cleavage**
