# Supplementary material for: A Rad51-independent pathway promotes single-strand template repair in gene editing
Source: PLoS Genet. 2020 Oct 15;16(10):e1008689. doi: 10.1371/journal.pgen.1008689 (PMC7591047; doi:10.1371/journal.pgen.1008689)
Supplement: S1 Dataset — (XLSX) [file pgen.1008689.s010.xlsx]

## Sheet: Fig. 1 - Xho1 Insertion
WT _YEPD															Rad51_YEPD
Test #	Plate 1	Plate 2	Plate 3		Average		Viability		Average Viability	Std. Dev.	Std. Error				Test #	Plate 1	Plate 2	Plate 3		Average		Viability		Average Viability	Std. Dev.	Std. Error
1	9920	9860	1130		6970		0.0122908		0.0166153	0.00553182	0.00126909				1	1590	1940	2250		1926.67		0.0185121		0.0170364	0.00836186	0.00191834
2	4610	4620	5080		4770		0.0249476								2	5850	6540	6440		6276.67		0.0204992
3	2190	2620	2900		2570		0.0229572								3	3410	3390	3490		3430		0.0335277
4	2740	3330	3930		3333.33		0.0191								4	8760	8490	8580		8610		0.0111111
5	3420	3380	3650		3483.33		0.0176077								5	3400	3260	3720		3460		0.0103083
6	3950	3860	4070		3960		0.0199495								6	1680	2060	1940		1893.33		0.0262324
7	2460	3850	3420		3243.33		0.0109969								7	2540	2670	2720		2643.33		0.0105927
8	1390	1280	1030		1233.33		0.0108108								8	1890	1870	1640		1800		0.0116667
9	1870	1910	1920		1900		0.0108772								9	860	1020	970		950		0.0108772
WT _GAL															Rad51 _GAL
Test #	Plate 1	Plate 2	Plate 3		Average										Test #	Plate 1	Plate 2	Plate 3		Average
1	84	92	81		85.6667										1	41	31	35		35.6667
2	133	118	106		119										2	143	125	118		128.667
3	56	58	63		59										3	130	134	81		115
4	54	69	68		63.6667										4	102	88	97		95.6667
5	56	68	60		61.3333										5	28	40	39		35.6667
6	72	91	74		79										6	49	62	38		49.6667
7	34	36	37		35.6667										7	33	27	24		28
8	12	11	17		13.3333										8	17	25	21		21
9	26	19	17		20.6667										9	9	11	11		10.3333
Rad50 _YEPD															Mre11 _YEPD
Test #	Plate 1	Plate 2	Plate 3		Average		Viability		Average Viability	Std. Dev.	Std. Error				Test #	Plate 1	Plate 2	Plate 3		Average		Viability		Average Viability	Std. Dev.	Std. Error
1	920	1230	1110		1086.67		0.000920245		0.00145313	0.000768605	0.000443754				1	2930	2920	2850		2900		0.00126437		0.00320855	0.0068291	0.00394278
2	6230	6070	6060		6120		0.000708061								2	970	1100	1080		1050		0.00634921
3	1300	1630	1830		1586.67		0.00273109								3	1550	1610	1810		1656.67		0.00201207
Rad50 _GAL															Mre11 _GAL
Test #	Plate 1	Plate 2	Plate 3		Average										Test #	Plate 1	Plate 2	Plate 3		Average
1	0	1	2		1										1	4	5	2		3.66667
2	4	4	5		4.33333										2	6	9	5		6.66667
3	5	2	6		4.33333										3	3	5	2		3.33333
Rad52 _YEPD															Rad54 _YEPD
Test #	Plate 1	Plate 2	Plate 3		Average		Viability		Average Viability	Std. Dev.	Std. Error				Test #	Plate 1	Plate 2	Plate 3		Average		Viability		Average Viability	Std. Dev.	Std. Error
1	2130	1890	2060		2026.67		0.00131579		0.0017543	0.0105315	0.00608036				1	5790	5730	5410		5643.33		0.0102776		0.0128331	0.00610113	0.00352249
2	5020	4680	4770		4823.33		0.00214236								2	5460	5470	5490		5473.33		0.00822168
3	4110	4060	4020		4063.33		0.00180476								3	1490	1510	1400		1466.67		0.02
Rad52 _GAL															Rad54 _GAL
Test #	Plate 1	Plate 2	Plate 3		Average										Test #	Plate 1	Plate 2	Plate 3		Average
1	3	3	2		2.66667										1	63	55	56		58
2	6	13	12		10.3333										2	49	46	40		45
3	9	8	5		7.33333										3	32	23	33		29.3333
Rad55 _YEPD															Rad59 _YEPD
Test #	Plate 1	Plate 2	Plate 3		Average		Viability		Average Viability	Std. Dev.	Std. Error				Test #	Plate 1	Plate 2	Plate 3		Average		Viability		Average Viability	Std. Dev.	Std. Error
1	1870	1740	1720		1776.67		0.0097561		0.0161998	0.00753954	0.00435296				1	2420	2670	2550		2546.67		0.0052356		0.00447446	0.00103891	0.000599817
2	1700	1820	1570		1696.67		0.0288802								2	6260	6650	5930		6280		0.00329087
3	2540	2680	2910		2710		0.0099631								3	4110	3660	3870		3880		0.00489691
Rad55 _GAL															Rad59 _GAL
Test #	Plate 1	Plate 2	Plate 3		Average										Test #					Average
1	18	17	17		17.3333										1	17	15	8		13.3333
2	56	45	46		49										2	23	20	19		20.6667
3	26	25	30		27										3	21	17	19		19
Sae2 _YEPD															Rdh54_YEPD
Test #	Plate 1	Plate 2	Plate 3		Average		Viability		Average Viability	Std. Dev.	Std. Error				Test #	Plate 1	Plate 2	Plate 3		Average		Viability		Average Viability	Std. Dev.	Std. Error
1	2370	2560	2200		2376.67		0.00995792		0.0112588	0.00178813	0.00103238				1	2730	2980	2920		2876.67		0.00973349		0.012353	0.00566531	0.00327087
2	2570	2380	2570		2506.67		0.0132979								2	6640	6740	7040		6806.67		0.0188541
3	2820	3450	3140		3136.67		0.0105207								3	7290	7640	7380		7436.67		0.00847154
Sae2 _GAL															Rdh54 _GAL
Test #	Plate 1	Plate 2	Plate 3		Average										Test #	Plate 1	Plate 2	Plate 3		Average
1	23	21	27		23.6667										1	26	30	28		28
2	29	40	31		33.3333										2	124	141	120		128.333
3	34	29	36		33										3	50	62	77		63
Ku70 _YEPD															Srs2 _YEPD
Test #	Plate 1	Plate 2	Plate 3		Average		Viability		Average Viability	Std. Dev.	Std. Error				Test #	Plate 1	Plate 2	Plate 3		Average		Viability		Average Viability	Std. Dev.	Std. Error
1	5540	5480	5810		5610		0.011527		0.0123896	0.00495057	0.00285821				1	2490	2770	3140		2800		0.00130952		0.00168332	0.000631596	0.000364652
2	3260	3230	3280		3256.67		0.0122825								2	2760	2950	2580		2763.33		0.00241255
3	4870	5360	5190		5140		0.0133593								3	3000	3630	3160		3263.33		0.00132789
Ku70 _GAL															Srs2 _GAL
Test #	Plate 1	Plate 2	Plate 3		Average										Test #					Average
1	45	70	79		64.6667										1	4	4	3		3.66667
2	31	42	47		40										2	6	8	6		6.66667
3	63	69	74		68.6667										3	4	4	5		4.33333
Mph1 _YEPD															Sgs1_YEPD
Test #	Plate 1	Plate 2	Plate 3		Average		Viability		Average Viability	Std. Dev.	Std. Error				Test #	Plate 1	Plate 2	Plate 3		Average		Viability		Average Viability	Std. Dev.	Std. Error
1	2390	2290	2430		2370		0.0146273		0.0167693	0.00789133	0.00455606				1	1050	900	920		956.667		0.00627178		0.00716091	0.00321084	0.00185378
2	3710	3780	3960		3816.67		0.0243668								2	1840	1920	1810		1856.67		0.00448833
3	1980	1710	1790		1826.67		0.0113139								3	1320	1510	1460		1430		0.0107226
Mph1 _GAL															Sgs1 _GAL
Test #	Plate 1	Plate 2	Plate 3		Average										Test #	Plate 1	Plate 2	Plate 3		Average
1	40	36	28		34.6667										1	6	4	8		6
2	86	92	101		93										2	9	7	9		8.33333
3	28	18	16	20.6667	20.6667										3	14	13	19		15.3333
Exo1 _YEPD															Rad1 _YEPD
Test #	Plate 1	Plate 2	Plate 3		Average		Viability		Average Viability	Std. Dev.	Std. Error				Test #	Plate 1	Plate 2	Plate 3		Average		Viability		Average Viability	Std. Dev.	Std. Error
1	2830	2850	2610		2763.33		0.00579011		0.0130006	0.0103252	0.00596128				1	3200	3260	3680		3380		0.00473373		0.0171154	0.0130896	0.00755729
2	3890	4460	4630		4326.67		0.00885978								2	3410	4520	4240		4056.67		0.0308135
3	3680	3660	3460		3600		0.0243519								3	7110	7600	7380		7363.33		0.015799
Exo1 _GAL															Rad1 _GAL
Test #	Plate 1	Plate 2	Plate 3		Average										Test #					Average
1	20	15	13		16										1	13	14	21		16
2	45	30	40		38.3333										2	123	126	126		125
3	66	112	85		87.6667										3	110	113	126		116.333
Fun30 _YEPD															Rad52-R70A_YEPD
Test #	Plate 1	Plate 2	Plate 3		Average		Viability		Average Viability	Std. Dev.	Std. Error				Test #	Plate 1	Plate 2	Plate 3		Average		Viability		Average Viability	Std. Dev.	Std. Error
1	3420	3760	3540		3573.33		0.0272388		0.0279127	0.000868675	0.00050153				1	720	590	670		660		0.00252525		0.00314334	0.0287571	0.0166029
2	1650	1720	1810		1726.67		0.0276062								2	1200	870	1080		1050		0.00190476
3	2030	2090	1210		1776.67		0.0288931								3	1440	1630	1730		1600		0.005
Fun30 _GAL															Rad52-R70A _GAL
Test #	Plate 1	Plate 2	Plate 3		Average										Test #	Plate 1	Plate 2	Plate 3		Average
1	92	96	104		97.3333										1	2	0	3		1.66667
2	52	43	48		47.6667										2	1	3	2		2
3	49	54	51		51.3333										3	8	9	7		8
Rad51_Rad59 _YEPD															Rad51_Rdh54 _YEPD
Test #	Plate 1	Plate 2	Plate 3		Average		Viability		Average Viability	Std. Dev.	Std. Error				Test #	Plate 1	Plate 2	Plate 3		Average		Viability		Average Viability	Std. Dev.	Std. Error
1	1130	790	1250		1056.67		0.0561514		0.0527413	0.0240029	0.0138581				1	810	720	720		750		0.0595556		0.0554208	0.00387782	0.00223886
2	2340	2670	2620		2543.33		0.0501966								2	1980	1890	1760		1876.67		0.051865
3	1970	2130	2030		2043.33		0.051876								3	3450	3290	3380		3373.33		0.0548419
Rad51_Rad59_ _GAL															Rad51_Rdh54 _GAL
Test #	Plate 1	Plate 2	Plate 3		Average										Test #					Average
1	54	61	63		59.3333										1	41	44	49		44.6667
2	118	136	129		127.667										2	92	101	99		97.3333
3	103	104	111		106										3	172	189	194		185
Rad51_Srs2 _YEPD															Rdh54_Srs2_YEPD
Test #	Plate 1	Plate 2	Plate 3		Average		Viability		Average Viability	Std. Dev.	Std. Error				Test #	Plate 1	Plate 2	Plate 3		Average		Viability		Average Viability	Std. Dev.	Std. Error
1	2330	2010	2320		2220		0.00705706		0.00915745	0.00250029	0.00144354				1	1680	1760	1440		1626.67		0.0116803		0.0122567	0.00469715	0.0027119
2	1970	1920	1880		1923.33		0.0084922								2	1430	1490	1500		1473.33		0.0149321
3	1130	1240	230		866.667		0.0119231								3	1840	1950	1920		1903.33		0.0101576
Rad51_Srs2 _GAL															Rdh54_Srs2 _GAL
Test #					Average										Test #	Plate 1	Plate 2	Plate 3		Average
1	15	15	17		15.6667										1	23	16	18		19
2	14	18	17		16.3333										2	27	18	21		22
3	12	10	9		10.3333										3	23	18	17		19.3333
Sgs1_Exo1_YEPD															Rdh54_Rad59_YEPD
Test #	Plate 1	Plate 2	Plate 3		Average		Viability		Average Viability	Std. Dev.	Std. Error				Test #	Plate 1	Plate 2	Plate 3		Average		Viability		Average Viability	Std. Dev.	Std. Error
1	5400	5100	6000		5500		0.00593939		0.00587795	0.00306817	0.00177141				1	2520	2460	2580		2520		0.00277778		0.00431563	0.00202188	0.00116733
2	4810	4790	4720		4773.33		0.00509777								2	4790	4480	4650		4640		0.00545977
3	2310	2380	1980		2223.33		0.0065967								3	4100	4730	4760		4530		0.00470935
Sgs1_Exo1_GAL															Rd54_Rad59_GAL
Test #	Plate 1	Plate 2	Plate 3		Average										Test #	Plate 1	Plate 2	Plate 3		Average
1	29	30	39		32.6667										1	8	7	6		7
2	23	21	29		24.3333										2	25	26	25		25.3333
3	17	12	15		14.6667										3	21	17	26		21.3333
Rad51_Rad52-R70A _YEPD															Rad59_Rad52-R70A _YEPD
Test #	Plate 1	Plate 2	Plate 3		Average		Viability		Average Viability	Std. Dev.	Std. Error				Test #	Plate 1	Plate 2	Plate 3		Average		Viability		Average Viability	Std. Dev.	Std. Error
1	1450	1280	1230		1320		0.000505051		0.000346158	0.000793672	0.000458227				1	1650	2680	2570		2300		0.00304348		0.00142211	0.00899023	0.00519051
2	1280	1240	1440		1320		0.000252525								2	1650	1660	1980		1763.33		0.000378072
3	1190	1180	1190		1186.67		0.000280899								3	3320	3090	3060		3156.67		0.000844773
Rad51_Rad52-R70A_GAL															Rad59_Rad52-R70A _GAL
Test #					Average										Test #					Average
1	2	0	0		0.666667										1	6	8	7		7
2	0	0	1		0.333333										2	1	0	1		0.666667
3	0	1	0		0.333333										3	3	3	2		2.66667
Mre11_Ku70_YEPD															Psy3_YEPD
Test #	Plate 1	Plate 2	Plate 3		Average		Viability		Average Viability	Std. Dev.	Std. Error				Test #	Plate 1	Plate 2	Plate 3		Average		Viability		Average Viability	Std. Dev.	Std. Error
1	1600	2200	600		1466.67		0.00204545		0.00174462	0.0117816	0.0068021				1	5320	4870	4720		4970		0.01167		0.0162745	0.00587021	0.00338917
2	2000	2300	2600		2300		0.00144928								2	2440	2570	2370		2460		0.0228997
3	2600	2900	3700		3066.67		0.00173913								3	6010	6530	5350		5963.33		0.0142538
Mre11_Ku70_GAL															Psy3_GAL
Test #	Plate 1	Plate 2	Plate 3		Average										Test #	Plate 1	Plate 2	Plate 3		Average
1	3	2	4		3										1	58	62	54		58
2	1	4	5		3.33333										2	51	56	62		56.3333
3	8	2	6		5.33333										3	81	92	82		85
Csm2_YEPD															Shu1_YEPD
Test #	Plate 1	Plate 2	Plate 3		Average		Viability		Average Viability	Std. Dev.	Std. Error				Test #	Plate 1	Plate 2	Plate 3		Average		Viability		Average Viability	Std. Dev.	Std. Error
1	2770	3100	3170		3013.33		0.0130531		0.0213519	0.00765454	0.00441935				1	11050	12320	12120		11830		0.00507185		0.0123994	0.00634798	0.00366501
2	3770	3820	4130		3906.67		0.0228669								2	6280	6100	6490		6290		0.0158983
3	2170	1550	2180		1966.67		0.0281356								3	2150	2400	2290		2280		0.0162281
Csm2_GAL															Shu1_GAL
Test #					Average										Test #					Average
1	45	35	38		39.3333										1	62	55	63		60
2	96	92	80		89.3333										2	71	69	160		100
3	47	69	50		55.3333										3	34	53	24		37

## Sheet: Fig 1 - dsDNA
Trial 1
YEPD	Plate 1	Plate 2	Plate 3		Average		Viability			Average Viability	Std. Dev.	Std. Error
WT	1520	1920	1820		1753.33		0.126426		WT	0.128037	0.00223249	0.00128893
Rad50	940	900	800		880		0.00189394		Rad50	0.00243978	0.000504199	0.0002911
Rad51	1950	1890	1680		1840		0.0440217		Rad51	0.0556854	0.010534	0.0060818
Rad52	1180	1060			1120		0.00119048		Rad52	0.00147537	0.000249204	0.000143878
Rad54	1320	1270	1370		1320		0.0429293		Rad54	0.0385565	0.00399986	0.00230932
Rad55	890	810	940		880		0.0590909		Rad55	0.0519228	0.00817541	0.000143878
Rad59	2680	2760	2710		2716.67		0.0317791		Rad59	0.0372672	0.00827687	0.00477865
Srs2	990	1250			1120		0.00505952		Srs2	0.00421323	0.000965182	0.000557248
Rdh54	2280	2330	2420		2343.33		0.0665718		Rdh54	0.0563662	0.0188987	0.0109112
Gal	Plate 1	Plate 2	Plate 3
WT	252	207	206		221.667
Rad50	4	0	1		1.66667
Rad51	83	84	76		81
Rad52	1	1	2		1.33333
Rad54	62	57	51		56.6667
Rad55	42	53	61		52
Rad59	91	81	87		86.3333
Srs2	4	4	9		5.66667
Rdh54	178	152	138		156
Trial 2
YEPD	Plate 1	Plate 2	Plate 3		Average		Viability
WT	530	870	1220		873.333		0.127099
Rad50	2430	2260	2010		2233.33		0.00253731
Rad51	4250	4200	3510		3986.67		0.0585284
Rad52	2140	2280	2530		2316.67		0.00158273
Rad54	2670	3200	2840		2903.33		0.0376579
Rad55	1040	1110	1130		1093.33		0.0536585
Rad59	3390	3090	3690		3390		0.033235
Srs2	3440	2630	3210		3093.33		0.0044181
Rdh54	3280	3970	4020		3756.67		0.0679681
Gal	Plate 1	Plate 2	Plate 3
WT	113	102	118		111
Rad50	2	6	9		5.66667
Rad51	226	232	242		233.333
Rad52	5	1	5		3.66667
Rad54	114	113	101		109.333
Rad55	72	56	48		58.6667
Rad59	101	120	117		112.667
Srs2	11	12	18		13.6667
Rdh54	230	286	250		255.333
Trial 3
YEPD	Plate 1	Plate 2	Plate 3		Average		Viability
WT	1270	1240	1250		1253.33		0.130585
Rad50	980	870	920		923.333		0.00288809
Rad51	1040	1110	1090		1080		0.0645062
Rad52	840	780	800		806.667		0.00165289
Rad54	2130	2240	2300		2223.33		0.0350825
Rad55	1790	1750	1760		1766.67		0.0430189
Rad59	1970	2030	2070		2023.33		0.0467875
Srs2	1640	1730	1690		1686.67		0.00316206
Rdh54	780	1010	930		906.667		0.0345588
Gal	Plate 1	Plate 2	Plate 3
WT	178	156	157		163.667
Rad50	3	4	1		2.66667
Rad51	88	54	67		69.6667
Rad52	1	1	2		1.33333
Rad54	72	78	84		78
Rad55	63	81	84		76
Rad59	106	90	88		94.6667
Srs2	3	8	5		5.33333
Rdh54	32	35	27		31.3333

## Sheet: Fig. 2 - SSA Assays
Viability
WT	rad51	rad59	rad51 rad59	rad52R70A	rad51 rad52 R70A	rad59 rad52R70A	rad51 rad59 rad52R70A
100	86	43.9	62	19.5	10.4	12	8.8
100	83	38.6	64	20.9	7.2	13	11.2
93	80	38	66	15.5	7	6.6	10
100		53		8		17
Repair Efficiency Compared to WT
WT	rad51	rad59	rad51 rad59	rad52R70A	rad51 rad52 R70A	rad59 rad52R70A	rad51 rad59 rad52R70A
100	58	28	40	7	11	8	10
100	63	20	41	8	4	9	7
100	82	24		8	4	6	7

## Sheet: Fig. 3 - Mutagenesis
URA 200 bp upstream													URA 200 bp downstream													URA 500 bp upstream
Spontaneous Rate													Spontaneous Rate													Spontaneous Rate
YEPD	Plate 1	Plate 2	Plate 3		Average		Mutation Rate		Average Mutation Rate	Std. Dev.	Std. Error.		YEPD	Plate 1	Plate 2	Plate 3		Average		Mutation Rate		Average Mutation Rate	Std. Dev.	Std. Error.		YEPD	Plate 1	Plate 2	Plate 3		Average		Mutation Rate		Average Mutation Rate	Std. Dev.	Std. Error.
Culture 1	7990000	9940000	8970000		8.96667e+06		7.43494e-08		3.50562e-07	3.91627e-07	1.23843e-07		Culture 1	64600000	66700000	64600000		65300000		1.32721e-07		2.16551e-07	7.57924e-08	2.39677e-08		Culture 1	120100000	96500000	117900000		111500000		2.98954e-08		1.15355e-07	1.52636e-07	4.82678e-08
Culture 2	11680000	11210000	11430000		11440000		1.74825e-07						Culture 2	70300000	76700000	77200000		7.47333e+07		1.87333e-07						Culture 2	63200000	51700000	51200000		5.53667e+07		4.81638e-08
Culture 3	12360000	11580000	11920000		1.19533e+07		6.41383e-07						Culture 3	175400000	167400000	164000000		1.68933e+08		1.49961e-07						Culture 3	157100000	152300000	160500000		1.56633e+08		2.97936e-08
Culture 4	11200000	12110000	11590000		1.16333e+07		2.86533e-08						Culture 4	98000000	102200000	101900000		100700000		2.87984e-07						Culture 4	9800000	9800000	10200000		9.93333e+06		3.69128e-07
Culture 5	10440000	10500000	10490000		1.04767e+07		3.18167e-08						Culture 5	66700000	66400000	70300000		67800000		2.85152e-07						Culture 5	10400000	11000000	11100000		1.08333e+07		4.30769e-07
Culture 6	11820000	12400000	12090000		1.21033e+07		6.60975e-07						Culture 6	231100000	228900000	229300000		2.29767e+08		1.43624e-07						Culture 6	2870000	26900000	26500000		1.87567e+07		1.77715e-08
Culture 7	12200000	13850000	12990000		1.30133e+07		2.56148e-08						Culture 7	3410000	34700000	40200000		2.61033e+07		3.32014e-07						Culture 7	51200000	49800000	50100000		5.03667e+07		5.29451e-08
Culture 8	11510000	12130000	11770000		1.18033e+07		1.01666e-06						Culture 8	52300000	51600000	54800000		52900000		1.32325e-07						Culture 8	7800000	9200000	9000000		8.66667e+06		3.84615e-08
Culture 9	15380000	15380000	15410000		15390000		2.16591e-08						Culture 9	10200000	11300000	11700000		1.10667e+07		2.40964e-07						Culture 9	18700000	18400000	19300000		18800000		1.06383e-07
Culture 10	15560000	12850000	14980000		1.44633e+07		8.29684e-07						Culture 10	7800000	9200000	8600000		8.53333e+06		2.73437e-07						Culture 10	31200000	33700000	34300000		3.30667e+07		3.02419e-08
FOA	Plate 1	Plate 2	Plate 3		Average								FOA	Plate 1	Plate 2	Plate 3		Average								FOA	Plate 1	Plate 2	Plate 3		Average
Culture 1	1	1	0		0.666667								Culture 1	8	14	4		8.66667								Culture 1	3	2	5		3.33333
Culture 2	1	3	2		2								Culture 2	16	12	14		14								Culture 2	2	0	6		2.66667
Culture 3	9	8	6		7.66667								Culture 3	29	14	33		25.3333								Culture 3	4	2	8		4.66667
Culture 4	0	0	1		0.333333								Culture 4	38	21	28		29								Culture 4	2	6	3		3.66667
Culture 5	0	0	1		0.333333								Culture 5	12	29	17		19.3333								Culture 5	2	4	8		4.66667
Culture 6	9	7	8		8								Culture 6	32	33	34		33								Culture 6	1	0	0		0.333333
Culture 7	1	0	0		0.333333								Culture 7	8	11	7		8.66667								Culture 7	2	3	3		2.66667
Culture 8	14	10	12		12								Culture 8	8	5	8		7								Culture 8	0	0	1		0.333333
Culture 9	1	0	0		0.333333								Culture 9	3	4	1		2.66667								Culture 9	1	3	2		2
Culture 10	12	11	13		12								Culture 10	3	3	1		2.33333								Culture 10	1	0	2		1
SSTR													SSTR													SSTR
GAL	Plate 1	Plate 2	Plate 3		Average		Mutation Rate		Average Mutation Rate	Std. Dev.	Std. Error.		GAL	Plate 1	Plate 2	Plate 3		Average		Mutation Rate		Average Mutation Rate	Std. Dev.	Std. Error.		GAL	Plate 1	Plate 2	Plate 3		Average		Mutation Rate		Average Mutation Rate	Std. Dev.	Std. Error.
Trial 1	14000	19000	17000		16666.7		0.00022		0.000207622	5.43521e-05	3.13802e-05		Trial 1	1180000	1320000	1250000		1250000		5.14667e-05		4.29089e-05	8.57393e-06	4.95016e-06		Trial 1	2620000	2510000	2720000		2.61667e+06		5.47771e-06		5.21234e-06	8.0579e-07	4.65223e-07
Trial 2	25000	18000	11000		18000		0.000148148						Trial 2	2250000	2390000	2160000		2.26667e+06		4.29412e-05						Trial 2	2630000	3090000	2870000		2.86333e+06		4.30733e-06
Trial 3	48000	35000	23000		35333.3		0.000254717						Trial 3	3290000	3070000	3110000		3.15667e+06		3.43189e-05						Trial 3	2000000	1950000	1860000		1.93667e+06		5.85198e-06
FOA	Plate 1	Plate 2	Plate 3		Average				Fold Increase				FOA	Plate 1	Plate 2	Plate 3		Average				Fold Increase				FOA	Plate 1	Plate 2	Plate 3		Average				Fold Increase
Trial 1	4	3	4		3.66667				592.253				Trial 1	77	67	49		64.3333				198.146				Trial 1	21	10	12		14.3333				45.1851
Trial 2	2	2	4		2.66667								Trial 2	116	99	77		97.3333								Trial 2	13	11	13		12.3333
Trial 3	7	11	9		9								Trial 3	106	125	94		108.333								Trial 3	12	9	13		11.3333
URA 1000 bp upstream													URA 1500 bp upstream													URA 2000 bp upstream
Spontaneous Rate													Spontaneous Rate													Spontaneous Rate
YEPD	Plate 1	Plate 2	Plate 3		Average		Mutation Rate		Average Mutation Rate	Std. Dev.	Std. Error.		YEPD	Plate 1	Plate 2	Plate 3		Average		Mutation Rate		Average Mutation Rate	Std. Dev.	Std. Error.		YEPD	Plate 1	Plate 2	Plate 3		Average		Mutation Rate		Average Mutation Rate	Std. Dev.	Std. Error.
Culture 1	101700000	100600000	105400000		1.02567e+08		4.54989e-08		4.04576e-07	3.61599e-07	1.14348e-07		Culture 1	53000000	51700000	50000000		5.15667e+07		1.91984e-06		5.28629e-07	5.31399e-07	1.68043e-07		Culture 1	90600000	88800000	85200000		88200000		2.34316e-07		1.94044e-07	6.71648e-08	2.12394e-08
Culture 2	50900000	50400000	53100000		5.14667e+07		3.17358e-07						Culture 2	184100000	181600000	176800000		1.80833e+08		3.42857e-07						Culture 2	59600000	61900000	62900000		6.14667e+07		1.89805e-07
Culture 3	199700000	195100000	193600000		1.96133e+08		1.0537e-07						Culture 3	52600000	52500000	50400000		5.18333e+07		2.1865e-07						Culture 3	65600000	66100000	66100000		6.59333e+07		1.11223e-07
Culture 4	10500000	10500000	10700000		1.05667e+07		1.07256e-06						Culture 4	28700000	29200000	29100000		29000000		5.86207e-07						Culture 4	9800000	10200000	10100000		1.00333e+07		9.96678e-08
Culture 5	121100000	119900000	117200000		119400000		2.79174e-08						Culture 5	24300000	21900000	23200000		2.31333e+07		3.89049e-07						Culture 5	23400000	24100000	27200000		24900000		2.40964e-07
Culture 6	6200000	7300000	7000000		6.83333e+06		1.95122e-07						Culture 6	9800000	10400000	9700000		9.96667e+06		1.33779e-07						Culture 6	51200000	56400000	53900000		5.38333e+07		1.42415e-07
Culture 7	23100000	28100000	24900000		2.53667e+07		9.59264e-07						Culture 7	11900000	14000000	13800000		1.32333e+07		8.06045e-07						Culture 7	7600000	7200000	8100000		7.63333e+06		1.74672e-07
Culture 8	30300000	31200000	31100000		3.08667e+07		5.07559e-07						Culture 8	23600000	24100000	27500000		2.50667e+07		2.65957e-07						Culture 8	11300000	11900000	10800000		1.13333e+07		3.23529e-07
Culture 9	12900000	14100000	13800000		13600000		3.92157e-07						Culture 9	72800000	741000000	71900000		2.95233e+08		1.43389e-07						Culture 9	27100000	30200000	29700000		29000000		1.95402e-07
Culture 10	10100000	11900000	11100000		1.10333e+07		4.22961e-07						Culture 10	36800000	36200000	37300000		3.67667e+07		4.80508e-07						Culture 10	45200000	43900000	46600000		4.52333e+07		2.28445e-07
FOA	Plate 1	Plate 2	Plate 3		Average								FOA	Plate 1	Plate 2	Plate 3		Average								FOA	Plate 1	Plate 2	Plate 3		Average
Culture 1	7	2	5		4.66667								Culture 1	92	97	108		99								Culture 1	21	22	19		20.6667
Culture 2	17	14	18		16.3333								Culture 2	63	58	65		62								Culture 2	11	18	6		11.6667
Culture 3	18	32	12		20.6667								Culture 3	14	7	13		11.3333								Culture 3	8	8	6		7.33333
Culture 4	9	18	7		11.3333								Culture 4	21	19	11		17								Culture 4	2	1	0		1
Culture 5	1	4	5		3.33333								Culture 5	9	11	7		9								Culture 5	8	7	3		6
Culture 6	2	1	1		1.33333								Culture 6	1	3	0		1.33333								Culture 6	10	5	8		7.66667
Culture 7	21	24	28		24.3333								Culture 7	12	10	10		10.6667								Culture 7	1	1	2		1.33333
Culture 8	16	22	9		15.6667								Culture 8	6	12	2		6.66667								Culture 8	3	4	4		3.66667
Culture 9	3	7	6		5.33333								Culture 9	42	49	36		42.3333								Culture 9	9	1	7		5.66667
Culture 10	4	4	6		4.66667								Culture 10	12	18	23		17.6667								Culture 10	9	14	8		10.3333
SSTR													SSTR													SSTR
GAL	Plate 1	Plate 2	Plate 3		Average		Mutation Rate		Average Mutation Rate	Std. Dev.	Std. Error.		GAL	Plate 1	Plate 2	Plate 3		Average		Mutation Rate		Average Mutation Rate	Std. Dev.	Std. Error.		GAL	Plate 1	Plate 2	Plate 3		Average		Mutation Rate		Average Mutation Rate	Std. Dev.	Std. Error.
Trial 1	1640000	1520000	1690000		1.61667e+06		8.24742e-07		2.697e-06	2.32932e-06	1.34483e-06		Trial 1	3250000	2570000	2570000		2.79667e+06		5.95948e-07		8.55433e-07	3.26635e-07	1.88583e-07		Trial 1	1150000	1450000	1000000		1200000		2.22222e-06		1.51308e-06	6.88878e-07	3.97724e-07
Trial 2	1250000	1160000	1160000		1190000		1.96078e-06						Trial 2	3360000	2840000	2800000		3000000		1.22222e-06						Trial 2	1450000	1220000	1410000		1360000		1.47059e-06
Trial 3	2080000	2010000	2130000		2.07333e+06		5.30547e-06						Trial 3	2730000	2530000	2760000		2.67333e+06		7.4813e-07						Trial 3	2930000	2780000	2560000		2.75667e+06		8.46433e-07
FOA	Plate 1	Plate 2	Plate 3		Average				Fold Increase				FOA	Plate 1	Plate 2	Plate 3		Average				Fold Increase				FOA	Plate 1	Plate 2	Plate 3		Average				Fold Increase
Trial 1	2	1	1		1.33333				6.66623				Trial 1	2	2	1		1.66667				1.61821				Trial 1	3	4	1		2.66667				7.79762
Trial 2	2	2	3		2.33333								Trial 2	6	3	2		3.66667								Trial 2	2	0	4		2
Trial 3	7	14	12		11								Trial 3	3	2	1		2								Trial 3	2	3	2		2.33333
URA 200 bp upstream Rev1													URA 200 bp upstream Rev3
Spontaneous Rate													Spontaneous Rate
YEPD	Plate 1	Plate 2	Plate 3		Average		Mutation Rate		Average Mutation Rate	Std. Dev.	Std. Error.		YEPD	Plate 1	Plate 2	Plate 3		Average		Mutation Rate		Average Mutation Rate	Std. Dev.	Std. Error.
Culture 1	33100000	36000000	34600000		3.45667e+07		9.6432e-09		2.04682e-07	2.49768e-07	7.89836e-08		Culture 1	4880000	4940000	4740000		4.85333e+06		1.37363e-07		3.19506e-07	1.96525e-07	6.21468e-08
Culture 2	6860000	6620000	6980000		6820000		9.77517e-08						Culture 2	6590000	6270000	6570000		6.47667e+06		2.57334e-07
Culture 3	58300000	55400000	58000000		5.72333e+07		5.82411e-09						Culture 3	6770000	7140000	6290000		6.73333e+06		1.48515e-07
Culture 4	6950000	6950000	7070000		6990000		4.76872e-08						Culture 4	6310000	5990000	5960000		6.08667e+06		5.47645e-08
Culture 5	4980000	5120000	5010000		5.03667e+06		6.61813e-08						Culture 5	6780000	7000000	7290000		7.02333e+06		3.32226e-07
Culture 6	9670000	8840000	9660000		9390000		3.54988e-08						Culture 6	4030000	4590000	4640000		4420000		3.77074e-07
Culture 7	1420000	1380000	1510000		1.43667e+06		4.64037e-07						Culture 7	3410000	3780000	3820000		3670000		6.35786e-07
Culture 8	980000	780000	830000		863333		7.72201e-07						Culture 8	3170000	3040000	2890000		3.03333e+06		2.1978e-07
Culture 9	1250000	1320000	1410000		1.32667e+06		2.51256e-07						Culture 9	1020000	990000	1230000		1080000		6.17284e-07
Culture 10	1010000	1090000	1270000		1.12333e+06		2.96736e-07						Culture 10	2220000	2410000	2600000		2410000		4.14938e-07
FOA	Plate 1	Plate 2	Plate 3		Average								FOA	Plate 1	Plate 2	Plate 3		Average
Culture 1	0	0	1		0.333333								Culture 1	0	1	1		0.666667
Culture 2	1	1	0		0.666667								Culture 2	1	2	2		1.66667
Culture 3	1	0	0		0.333333								Culture 3	2	1	0		1
Culture 4	1	0	0		0.333333								Culture 4	0	0	1		0.333333
Culture 5	1	0	0		0.333333								Culture 5	3	2	2		2.33333
Culture 6	0	1	0		0.333333								Culture 6	2	0	3		1.66667
Culture 7	1	1	0		0.666667								Culture 7	1	2	4		2.33333
Culture 8	1	0	1		0.666667								Culture 8	1	0	1		0.666667
Culture 9	0	0	1		0.333333								Culture 9	0	1	1		0.666667
Culture 10	1	0	0		0.333333								Culture 10	1	2	0		1
SSTR													SSTR
GAL	Plate 1	Plate 2	Plate 3		Average		Mutation Rate		Average Mutation Rate	Std. Dev.	Std. Error.		GAL	Plate 1	Plate 2	Plate 3		Average		Mutation Rate		Average Mutation Rate	Std. Dev.	Std. Error.
Trial 1	141000	180000	176000		165667		0		1.54679e-06	2.67912e-06	1.54679e-06		Trial 1	159000	187000	170000		172000		5.81395e-06		3.08346e-06	2.923e-06	1.6876e-06
Trial 2	139000	149000	143000		143667		0						Trial 2	199000	201000	182000		194000		3.43643e-06
Trial 3	139000	173000	119000		143667		4.64037e-06						Trial 3	203000	192000	210000		201667		0
FOA	Plate 1	Plate 2	Plate 3		Average				Fold Increase				FOA	Plate 1	Plate 2	Plate 3		Average				Fold Increase
Trial 1	0	0	0		0				7.55706				Trial 1	0	1	2		1				9.6507
Trial 2	0	0	0		0								Trial 2	1	0	1		0.666667
Trial 3	1	1	0		0.666667								Trial 3	0	0	0		0

## Sheet: Fig. 4 - 1kb Deletion Template
WT _YEPD															Rad51_YEPD
Test #	Plate 1	Plate 2	Plate 3		Average		Viability		Average Viability	Std. Dev.	Std. Error				Test #	Plate 1	Plate 2	Plate 3		Average		Viability		Average Viability	Std. Dev.	Std. Error
1	1750	1660	1890		1766.67		0.0122642		0.0097866	0.00248002	0.00087682				1	3540	3030	3140		3236.67		0.007724		0.0151628	0.00576024	0.00203655
2	4510	4410	4950		4623.33		0.00641673								2	1890	1570	1740		1733.33		0.0271154
3	2540	2350	2310		2400		0.0111111								3	5270	5170	4690		5043.33		0.0150033
4	3370	3120	3090		3193.33		0.00647182								4	2270	2320	2360		2316.67		0.0179856
5	2970	2890	2870		2910		0.00824742								5	2980	2970	2990		2980		0.0131991
6	1300	1090	1260		1216.67		0.0112329								6	870	890	940		900		0.0107407
7	2130	2080	2070		2093.33		0.00987261								7	1540	1620	1590		1583.33		0.0136842
8	1870	1920	1890		1893.33		0.0126761								8	1980	2030	2110		2040		0.0158497
WT _GAL															Rad51_GAL
Test #	Plate 1	Plate 2	Plate 3		Average										Test #	Plate 1	Plate 2	Plate 3		Average
1	20	25	20		21.6667										1	26	25	24		25
2	33	25	31		29.6667										2	41	64	36		47
3	21	26	33		26.6667										3	64	76	87		75.6667
4	19	19	24		20.6667										4	54	39	32		41.6667
5	25	26	21		24										5	37	42	39		39.3333
6	18	11	12		13.6667										6	12	9	8		9.66667
7	21	20	21		20.6667										7	21	21	23		21.6667
8	28	23	21		24										8	28	32	37		32.3333
Rad50 _YEPD															Mre11 _YEPD
Test #	Plate 1	Plate 2	Plate 3		Average		Viability		Average Viability	Std. Dev.	Std. Error				Test #	Plate 1	Plate 2	Plate 3		Average		Viability		Average Viability	Std. Dev.	Std. Error
1	1230	1150	1130		1170		0.0025641		0.00312823	0.000489439	0.000282578				1	1770	1700	2040		1836.67		0.000544465		0.00338702	0.00344216	0.00198733
2	5550	5980	5330		5620		0.00338078								2	1010	1170	1150		1110		0.0024024
3	1180	1240	1650		1356.67		0.0034398								3	2940	2960	3110		3003.33		0.00721421
Rad50 _GAL															Mre11 _GAL
Test #	Plate 1	Plate 2	Plate 3		Average										Test #	Plate 1	Plate 2	Plate 3		Average
1	2	5	2		3										1	1	0	2		1
2	24	12	21		19										2	4	2	2		2.66667
3	5	5	4		4.66667										3	20	27	18		21.6667
Rad52 _YEPD															Rad54 _YEPD
Test #	Plate 1	Plate 2	Plate 3		Average		Viability		Average Viability	Std. Dev.	Std. Error				Test #	Plate 1	Plate 2	Plate 3		Average		Viability		Average Viability	Std. Dev.	Std. Error
1	4210	4380	4300		4296.67		0.00170675		0.00188629	0.000570777	0.000329538				1	1840	2130	1720	1896.67	1896.67		0.00123023		0.0105002	0.0103221	0.00595947
2	4640	4490	4730		4620		0.00252525								2	4840	5320	5240		5133.33		0.0216234
3	2910	2870	2630		2803.33		0.00142687								3	5570	5820	5610		5666.67		0.00864706
Rad52 _GAL															Rad54 _GAL
Test #	Plate 1	Plate 2	Plate 3		Average										Test #	Plate 1	Plate 2	Plate 3		Average
1	6	6	10		7.33333										1	3	2	2		2.33333
2	14	12	9		11.6667										2	109	120	104		111
3	6	2	4		4										3	49	53	45		49
Rad55 _YEPD															Rad59 _YEPD
Test #	Plate 1	Plate 2	Plate 3		Average		Viability		Average Viability	Std. Dev.	Std. Error				Test #	Plate 1	Plate 2	Plate 3		Average		Viability		Average Viability	Std. Dev.	Std. Error
1	2480	2700	2710		2630		0.00608365		0.00955969	0.00510272	0.00294606				1	2980	3050	2610		2880		0.00509259		0.00305272	0.00177064	0.00102228
2	1760	1870	1880		1836.67		0.0179673								2	5480	5290	5490		5420		0.00215252
3	1820	2110	2120		2016.67		0.0046281								3	3730	3610	4160		3833.33		0.00191304
Rad55 _GAL															Rad59 _GAL
Test #	Plate 1	Plate 2	Plate 3		Average										Test #	Plate 1	Plate 2	Plate 3		Average
1	20	13	15		16										1	12	16	16		14.6667
2	29	34	36		33										2	13	10	12		11.6667
3	8	8	12		9.33333										3	5	10	7		7.33333
Sae2 _YEPD															Rdh54_YEPD
Test #	Plate 1	Plate 2	Plate 3		Average		Viability		Average Viability	Std. Dev.	Std. Error				Test #	Plate 1	Plate 2	Plate 3		Average		Viability		Average Viability	Std. Dev.	Std. Error
1	2810	2540	2660		2670		0.0108614		0.0110198	0.0031543	0.00182113				1	2100	2160	2130		2130		0.00735524		0.0120734	0.00409411	0.00236374
2	2580	2730	2760		2690		0.0142503								2	7270	7280	7530		7360		0.0141757
3	3370	3200	3370		3313.33		0.00794769								3	4680	6540	6480		5900		0.0146893
Sae2 _GAL															Rdh54 _GAL
Test #	Plate 1	Plate 2	Plate 3		Average										Test #	Plate 1	Plate 2	Plate 3		Average
1	25	32	30		29										1	14	14	19		15.6667
2	34	35	46		38.3333										2	116	107	90		104.333
3	21	30	28		26.3333										3	89	77	94		86.6667
Fun30 _YEPD															Srs2 _YEPD
Test #	Plate 1	Plate 2	Plate 3		Average		Viability		Average Viability	Std. Dev.	Std. Error				Test #	Plate 1	Plate 2	Plate 3		Average		Viability		Average Viability	Std. Dev.	Std. Error
1	5320	5520	5170		5336.67		0.0217989		0.0185087	0.00696055	0.00401867				1	1740	2070	2340		2050		0.00211382		0.00213738	0.000197936	0.000114278
2	1690	1350	1440		1493.33		0.0232143								2	2200	2320	2300		2273.33		0.00234604
3	4050	3950	3890		3963.33		0.010513								3	2960	3180	3080		3073.33		0.00195228
Fun30 _GAL															Srs2 _GAL
Test #	Plate 1	Plate 2	Plate 3		Average										Test #	Plate 1	Plate 2	Plate 3		Average
1	113	112	124		116.333										1	4	3	6		4.33333
2	35	33	36		34.6667										2	6	4	6		5.33333
3	37	37	51		41.6667										3	4	7	7		6
Mph1 _YEPD															Sgs1_YEPD
Test #	Plate 1	Plate 2	Plate 3		Average		Viability		Average Viability	Std. Dev.	Std. Error				Test #	Plate 1	Plate 2	Plate 3		Average		Viability		Average Viability	Std. Dev.	Std. Error
1	4530	4700	4920		4716.67		0.00537102		0.00917646	0.00314479	0.00181564				1	800	900	820		840		0.00238095		0.00626962	0.00301359	0.0017399
2	4640	4430	4790		4620		0.0120491								2	2380	2740	2680		2600		0.00679487
3	2430	2690	2200		2440		0.0101093								3	1460	1640	1260		1453.33		0.00963303
Mph1 _GAL															Sgs1 _GAL
Test #	Plate 1	Plate 2	Plate 3		Average										Test #	Plate 1	Plate 2	Plate 3		Average
1	25	27	24		25.3333										1	2	3	1		2
2	55	43	69		55.6667										2	18	16	19		17.6667
3	26	25	23		24.6667										3	13	19	10		14
Exo1 _YEPD															Rad1 _YEPD
Test #	Plate 1	Plate 2	Plate 3		Average		Viability		Average Viability	Std. Dev.	Std. Error				Test #	Plate 1	Plate 2	Plate 3		Average		Viability		Average Viability	Std. Dev.	Std. Error
1	4290	4300	4180		4256.67		0.0146437		0.0125634	0.00207825	0.00119988				1	3150	3540	3790		3493.33		0.00162214		0.00320197	0.00151375	0.000873964
2	3860	4330	3920		4036.67		0.0104872								2	3740	3890	4440		4023.33		0.0046396
3	1390	1480	1350		1406.67		0.0125592								3	7440	7600	6490		7176.67		0.00334417
Exo1 _GAL															Rad1 _GAL
Test #	Plate 1	Plate 2	Plate 3		Average										Test #	Plate 1	Plate 2	Plate 3		Average
1	63	59	65		62.3333										1	4	6	7		5.66667
2	36	49	42		42.3333										2	10	22	24		18.6667
3	17	21	15		17.6667										3	22	24	26		24
Rad51_Rad59 _YEPD															Rad51_Rdh54 _YEPD
Test #	Plate 1	Plate 2	Plate 3		Average		Viability		Average Viability	Std. Dev.	Std. Error				Test #	Plate 1	Plate 2	Plate 3		Average		Viability		Average Viability	Std. Dev.	Std. Error
1	880	890	1040		936.667		0.0362989		0.0352987	0.00161166	0.000930492				1	790	650	690		710		0.0685446		0.0654123	0.00292759	0.00169024
2	3420	3630	3100		3383.33		0.0361576								2	3290	3170	3230		3230		0.0627451
3	4250	4290	4020		4186.67		0.0334395								3	2780	2870	2880		2843.33		0.0649472
Rad51_Rad59_ _GAL															Rad51_Rdh54 _GAL
Test #	Plate 1	Plate 2	Plate 3		Average										Test #					Average
1	32	31	39		34										1	46	57	43		48.6667
2	107	122	138		122.333										2	217	199	192		202.667
3	129	149	142		140										3	182	193	179		184.667
Rad51_Srs2 _YEPD															Rdh54_Srs2_YEPD
Test #	Plate 1	Plate 2	Plate 3		Average		Viability		Average Viability	Std. Dev.	Std. Error				Test #	Plate 1	Plate 2	Plate 3		Average		Viability		Average Viability	Std. Dev.	Std. Error
1	1750	1680	1760		1730		0.00635838		0.00669056	0.00155658	0.000898692				1	2260	2430	1990		2226.67		0.00943114		0.00697149	0.00312585	0.00180471
2	3240	3190	2990		3140		0.00838641								2	2130	2070	2040		2080		0.00897436
3	1320	1440	1370		1376.67		0.00532688								3	980	890	920		930		0.00250896
Rad51_Srs2 _GAL															Rdh54_Srs2 _GAL
Test #					Average										Test #	Plate 1	Plate 2	Plate 3		Average
1	10	10	13		11										1	24	22	17		21
2	23	29	27		26.3333										2	19	14	23		18.6667
3	9	6	7		7.33333										3	2	2	3		2.33333
Sgs1_Exo1_YEPD															Rdh54_Rad59_YEPD
Test #	Plate 1	Plate 2	Plate 3		Average		Viability		Average Viability	Std. Dev.	Std. Error				Test #	Plate 1	Plate 2	Plate 3		Average		Viability		Average Viability	Std. Dev.	Std. Error
1	7500	8000	6200		7233.33		0.00129032		0.00128488	0.000368354	0.000212669				1	2590	2460	2260		2436.67		0.00560876		0.00394579	0.00160418	0.000926171
2	6980	6790	6830		6866.67		0.00165049								2	4240	4140	4080		4153.33		0.0024077
3	2380	2310	2970		2553.33		0.000913838								3	5060	5630	6060		5583.33		0.0038209
Sgs1_Exo1_GAL															Rd54_Rad59_GAL
Test #	Plate 1	Plate 2	Plate 3		Average										Test #	Plate 1	Plate 2	Plate 3		Average
1	18	6	4		9.33333										1	15	12	14		13.6667
2	9	14	11		11.3333										2	9	11	10		10
3	3	2	2		2.33333										3	19	18	27		21.3333

## Sheet: Fig. 5 - Mismatch Template
DG_373
WT _YEPD													Sgs1 _YEPD
Test #	Plate 1	Plate 2	Plate 3		Average		Viability		Average Viability	Std. Dev.	Std. Error		Test #	Plate 1	Plate 2	Plate 3		Average		Viability		Average Viability	Std. Dev.	Std. Error
1	18500	20510	19290		19433.3		0.0191767		0.0165035	0.00357975	0.00206677		1	2040	2230	2370		2213.33		0.00707831		0.00972835	0.00414261	0.00239174
2	10290	10570			10430		0.0196548						2	920	820	890		876.667		0.00760456
3	5200	5510	5390		5366.67		0.0159627						3	2890	3290	3060		3080		0.0145022
WT _GAL													Sgs1 _GAL
Test #	Plate 1	Plate 2	Plate 3		Average								Test #	Plate 1	Plate 2	Plate 3		Average
1	353	380	385		372.667								1	18	20	9		15.6667
2	228	213	174		205								2	13	1	6		6.66667
3	78	97	82		85.6667								3	38	53	43		44.6667
Msh2 _YEPD													Pol2-4_YEPD
Test #	Plate 1	Plate 2	Plate 3		Average		Viability		Average Viability	Std. Dev.	Std. Error		Test #	Plate 1	Plate 2	Plate 3		Average		Viability		Average Viability	Std. Dev.	Std. Error
1	9860	9370	9550		9593.33		0.0111536		0.0147422	0.00432418	0.00249657		1	480	650	480		536.667		0.0254658		0.0314785	0.00774444	0.00447125
2	4360	4470	4400		4410		0.0135299						2	1130	1400	1150		1226.67		0.0402174
3	5270	5280	5210		5253.33		0.0195431						3	1780	1920	1830		1843.33		0.0287523
Msh2 _GAL													Pol2-4_GAL
Test #	Plate 1	Plate 2	Plate 3		Average								Test #	Plate 1	Plate 2	Plate 3		Average
1	101	111	109		107								1	6	16	19		13.6667
2	72	89	18		59.6667								2	40	52	56		49.3333
3	108	98	102		102.667								3	60	51	48		53
Pol3-01_YEPD
Test #	Plate 1	Plate 2	Plate 3		Average		Viability		Average Viability	Std. Dev.	Std. Error
1	1320	1410	1240		1323.33		0.0309824		0.0361449	0.00818276	0.00472432
2	1740	1540	1810		1696.67		0.0455796
3	3560	4010	4070		3880		0.0318729
Pol3-01_GAL
Test #	Plate 1	Plate 2	Plate 3		Average
1	48	34	41		41
2	92	69	71		77.3333
3	142	98	131		123.667
DG_374
WT _YEPD													Sgs1 _YEPD
Test #	Plate 1	Plate 2	Plate 3		Average		Viability		Average Viability	Std. Dev.	Std. Error		Test #	Plate 1	Plate 2	Plate 3		Average		Viability		Average Viability	Std. Dev.	Std. Error
1	15310	17350	16120		16260		0.00692907		0.00762046	0.000595485	0.000343804		1	2560	2110	2250		2306.67		0.00419075		0.00371508	0.000427032	0.000246547
2	10630	10870			10750		0.00815504						2	660	600	690		650		0.00358974
3	6740	6710	6660		6703.33		0.00805569						3	2280	2660	2490		2476.67		0.00336474
WT _GAL													Sgs1 _GAL
Test #	Plate 1	Plate 2	Plate 3		Average								Test #	Plate 1	Plate 2	Plate 3		Average
1	103	116	119		112.667								1	14	10	5		9.66667
2	97	81	85		87.6667								2	3	4	0		2.33333
3	51	57	54		54								3	11	10	4		8.33333
Msh2 _YEPD													Pol2-4_YEPD
Test #	Plate 1	Plate 2	Plate 3		Average		Viability		Average Viability	Std. Dev.	Std. Error		Test #	Plate 1	Plate 2	Plate 3		Average		Viability		Average Viability	Std. Dev.	Std. Error
1	980	1030	1050		1020		0.00816993		0.00752766	0.000630061	0.000363766		1	480	660	680		606.667		0.0148352		0.013866	0.00286159	0.00165214
2	2370	2520	2490		2460		0.00691057						2	1640	1090			1365		0.0161172
3	3440	3370	3320		3376.67		0.00750247						3	1800	1890	2040		1910		0.0106457
Msh2 _GAL													Pol2-4_GAL
Test #	Plate 1	Plate 2	Plate 3		Average								Test #	Plate 1	Plate 2	Plate 3		Average
1	9	7	9		8.33333								1	8	8	11		9
2	21	18	12		17								2	20	16	30		22
3	26	23	27		25.3333								3	25	16	20		20.3333
Pol3-01_YEPD
Test #	Plate 1	Plate 2	Plate 3		Average		Viability		Average Viability	Std. Dev.	Std. Error
1	800	1010			905		0.0110497		0.0160438	0.00586709	0.00338737
2	1760	1780	1170		1570		0.0225053
3	3960	3610	4230		3933.33		0.0145763
Pol3-01_GAL
Test #	Plate 1	Plate 2	Plate 3		Average
1	6	11	13		10
2	26	47	33		35.3333
3	58	58	56		57.3333
CONTROL - DG_287
WT - YEPD
Test #	Plate 1	Plate 2	Plate 3		Average		Viability		Average Viability	Std. Dev.	Std. Error
1	1220	1480	1440		1380		0.0357488		0.0285785	0.00995453	0.00574725
2	4610	4620	5080		4770		0.0249476
3	9510	9790	10020		9773.33		0.0374488
4	3420	3200	3090		3236.67		0.0161689
WT_GAL
Test #	Plate 1	Plate 2	Plate 3		Average
1	46	48	54		49.3333
2	133	118	106		119
3	373	364	361		366
4	52	56	49		52.3333

## Sheet: Fig. 6 - Retron Assays
URA+ Counts						LYS+ Counts
Plasmid 396	Plate 1	Plate 2	Plate 3	Average		Plasmid 396	Plate 1	Plate 2	Plate 3	Average		%SSTR		396	Average SSTR	Std. Dev.	Std. Error
WT	3320	3090		3205		WT	0	2		1		0.000312012		WT	0.000232209	0.000204349	0.000117981
WT	1280	1320		1300		WT	0	1		0.5		0.000384615		rad50	0.00044635	0.000435244	0.000251288
WT	2190	2210		2200		WT	0	0		0		0		rad51	0.00345982	0.00115845	0.00066883
Rad50	1690	1800		1745		Rad50	0	0		0		0		rad52	0.00181128	0.00112627	0.000650253
Rad50	1030	120		575		Rad50	1	0		0.5		0.000869565		rad55	0.00375959	0.000857414	0.000495028
Rad50	970	1160		1065		Rad50	0	1		0.5		0.000469484		rad59	0.0137423	0.00336511	0.00194285
Rad51	3350	3630		3490		Rad51	7	9		8		0.00229226		rdh54	0.00827396	0.00160127	0.000924493
Rad51	2510	2090		2300		Rad51	7	9		8		0.00347826		srs2	0.00353513	0.0006008	0.000346872
Rad51	3720	3440		3580		Rad51	16	17		16.5		0.00460894		fun30	0.0212528	0.000699024	0.000403582
Rad52	2610	3210		2910		Rad52	1	2		1.5		0.000515464		rad51/rad59	0.00868351	0.00125155	0.000722582
Rad52	2750	2730		2740		Rad52	6	8		7		0.00255474		rad51/rdh54	0.0115625	0.00246389	0.00142253
Rad52	2770	2730		2750		Rad52	4	9		6.5		0.00236364
Rad55	3530	3600		3565		Rad55	14	9		11.5		0.00322581
Rad55	1700	1880		1790		Rad55	10	7		8.5		0.0047486
Rad55	2440	3310		2875		Rad55	11	8		9.5		0.00330435
Rad59	2930	3340		3135		Rad59	44	48		46		0.014673
Rad59	4900	5290		5095		Rad59	55	47		51		0.0100098
Rad59	3140	2300		2720		Rad59	45	45		45		0.0165441
Rdh54	2760	2730		2745		Rdh54	22	18		20		0.00728597
Rdh54	2770	2490		2630		Rdh54	15	24		19.5		0.00741445
Rdh54	2040	2900		2470		Rdh54	27	23		25		0.0101215
Srs2	3480	2350		2915		Srs2	12	10		11		0.00377358
Srs2	2650	2610		2630		Srs2	4	11		7.5		0.00285171
Srs2	2010			2010		Srs2	10	6		8		0.0039801
Fun30	4710	4790		4750		Fun30	96	99		97.5		0.0205263
Fun30	7640	6730		7185		Fun30	162	153		157.5		0.0219207
Fun30	3550	4380		3965		Fun30	98	71		84.5		0.0213115
Rad51 Rad59	640	730	440	685		Rad51 Rad59	6	5	2	5.5		0.0080292
Rad51 Rad59	570	570	470	570		Rad51 Rad59	3	6	7	4.5		0.00789474
Rad51 Rad59	330	460	420	395		Rad51 Rad59	5	3	4	4		0.0101266
Rad51 Rdh54	112	101	119	106.5		Rad51 Rdh54	2	0	1	1		0.00938967
Rad51 Rdh54	244	271	268	257.5		Rad51 Rdh54	3	3	5	3.66667		0.0142395
Rad51 Rdh54	201	221	213	211		Rad51 Rdh54	2	3	2	2.33333		0.0110585
Plasmid 397	Plate 1	Plate 2	Plate 3	Average		Plasmid 397	Plate 1	Plate 2	Plate 3	Average		% SSTR		397	Average SSTR	Std. Dev.	Std. Error
WT	321	329	309	319.667		WT	102	109	116	109		0.34098		WT	0.3377	0.0312138	0.0180213
WT	298	302	307	302.333		WT	112	117	104	111		0.367144		rad50	0.0130012	0.00916415	0.00529092
WT	199	211	213	207.667		WT	52	71	67	63.3333		0.304976		rad51	0.55512	0.0929812	0.0536827
Rad50	174	186		180		Rad50	1	0		0.5		0.00277778		rad52	0.00251515	0.0022458	0.00129661
Rad50	151	142		146.5		Rad50	1	5		3		0.0204778		rad55	0.368483	0.0481333	0.0277898
Rad50	147	107		127		Rad50	0	4		2		0.015748		rad59	0.199228	0.036356	0.0209901
Rad51	478	427		452.5		Rad51	208	216		212		0.468508		rdh54	0.299195	0.0959024	0.0553693
Rad51	184			184		Rad51	105	95		100		0.543478		srs2	0.203262	0.0136147	0.00786047
Rad51	169	157		163		Rad51	113	100		106.5		0.653374		fun30	0.545771	0.0621505	0.0358826
Rad52	164	146		155		Rad52	1	0		0.5		0.00322581		rad51/rad59	0.359163	0.0613582	0.0354252
Rad52	221	242		231.5		Rad52	0	2		1		0.00431965		rad51/rdh54	0.280803	0.0365885	0.0211244
Rad52	230	224		227		Rad52	0	0		0		0
Rad55	199	193		196		Rad55	67	96		81.5		0.415816
Rad55	227	227		227		Rad55	75	93		84		0.370044
Rad55	238	247		242.5		Rad55	74	81		77.5		0.319588
Rad59	323	287		305		Rad59	48	50		49		0.160656
Rad59	496	464		480		Rad59	103	93		98		0.204167
Rad59	504	488		496		Rad59	106	125		115.5		0.232863
Rdh54	480	403		441.5		Rdh54	76	91		83.5		0.189128
Rdh54	499			499		Rdh54	176	167		171.5		0.343687
Rdh54	379	342		360.5		Rdh54	121	142		131.5		0.364771
Srs2	376	355		365.5		Srs2	80	59		69.5		0.19015
Srs2	348	356		352		Srs2	76	77		76.5		0.21733
Srs2	442	512		477		Srs2	94	99		96.5		0.202306
Fun30	237	281		259		Fun30	126	148		137		0.528958
Fun30	427	454		440.5		Fun30	215	220		217.5		0.493757
Fun30	334	351		342.5		Fun30	208	213		210.5		0.614599
Rad51 Rad59	52	43	41	47.5		Rad51 Rad59	16	20	14	16.6667		0.350877
Rad51 Rad59	96	87	62	91.5		Rad51 Rad59	21	26	36	27.6667		0.302368
Rad51 Rad59	64	68	64	66		Rad51 Rad59	35	27	22	28		0.424242
Rad51 Rdh54	157	142	151	149.5		Rad51 Rdh54	43	46	31	40		0.267559
Rad51 Rdh54	201	217	218	209		Rad51 Rdh54	64	67	71	67.3333		0.322169
Rad51 Rdh54	364	351	369	357.5		Rad51 Rdh54	98	92	81	90.3333		0.252681

## Sheet: S3
All DG_287 Trials
WT _YEPD
Test #	Plate 1	Plate 2	Plate 3		Average		Viability		Average Viability	Std. Dev.	Std. Error
1	9920	9860	1130		6970		0.0122908		0.0268757	0.00553182	0.00126909
2	4610	4620	5080		4770		0.0249476
3	2190	2620	2900		2570		0.0229572
4	2740	3330	3930		3333.33		0.0191
5	3420	3380	3650		3483.33		0.0176077
6	3950	3860	4070		3960		0.0199495
7	2460	3850	3420		3243.33		0.0109969
8	1390	1280	1030		1233.33		0.0108108
9	1870	1910	1920		1900		0.0108772
10	1220	1480	1440		1380		0.0357488
11	9510	9790	10020		9773.33		0.0374488
12	3420	3200	3090		3236.67		0.0161689
13	5480	5610	6490		5860		0.0410694
14	3410	3550	3630		3530		0.0454202
15	2460	2170	2280		2303.33		0.0421129
16	1860	1670	1660		1730		0.0325626
17	920	840	800		853.333		0.0292969
18	1140	1230	1290		1220		0.0434426
19	2190	2220	2780		2396.67		0.0378303
WT _GAL																		Viability		Average Viability	Std. Dev.	Std. Error
Test #	Plate 1	Plate 2	Plate 3		Average													#DIV/0!		#DIV/0!	#DIV/0!	#DIV/0!
1	84	92	81		85.6667													#DIV/0!
2	133	118	106		119													#DIV/0!
3	56	58	63		59													#DIV/0!
4	54	69	68		63.6667													#DIV/0!
5	56	68	60		61.3333													#DIV/0!
6	72	91	74		79													#DIV/0!
7	34	36	37		35.6667													#DIV/0!
8	12	11	17		13.3333													#DIV/0!
9	26	19	17		20.6667
10	46	48	54		49.3333
11	373	364	361		366
12	52	56	49		52.3333
13	231	259	232		240.667
14	153	172	156		160.333
15	102	97	92		97
16	52	59	58		56.3333
17	27	23	25		25
18	52	58	49		53
19	88	94	90		90.6667
